# Supplementary material for: Bioengineered Spatially Heterogeneous Tumor Microenvironment Model Mediated by Tumor-Stromal Interactions for Multi-Drug Synergy Evaluation
Source: Research Square preprint supplement (doi:10.21203/rs.3.rs-8488007/v1), 2026-01-21
Supplement: Supplementary file 1 [file 6e9b758da2210d661d3bcd88.docx]

***Supporting Information for the Article:***

**Bioengineered Spatially Heterogeneous Tumor Microenvironment Model Mediated by Tumor-Stromal Interactions for Multi-Drug Synergy Evaluation**

*You Chen1,2,#, Yifan Xue1,2,#, Jiahuan Yang1, Jing Li1, Junfeng Hu1, Jie Liu**

*1School of Biomedical Engineering, Shenzhen Campus of Sun Yat-Sen University; Shenzhen, Guangdong, 518107, China.*

*2Guangdong Provincial Key Laboratory of Sensor Technology and Biomedical Instrument, Sun Yat-Sen University; Guangzhou, Guangdong, China.*

*# Contributed equally to this work.*

** Corresponding Authors:*

*Prof. Jie Liu*

*Email: liujie56@mail.sysu.edu.cn*





**Fig.S1** Rheological amplitude sweep tests on two 3D cell culture matrix materials, adECM and adEMA, with an applied oscillatory strain range of 0.1-100%.


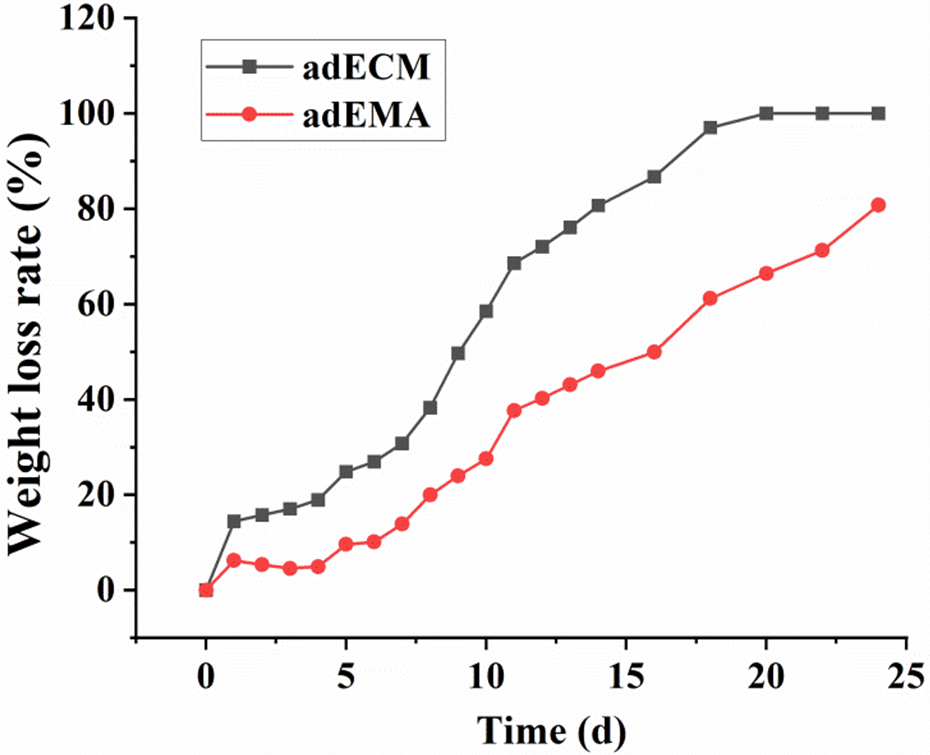


**Fig.S2** Experimental results of in vitro degradation rate of two 3D cell culture matrix adECM and adEMA hydrogels.


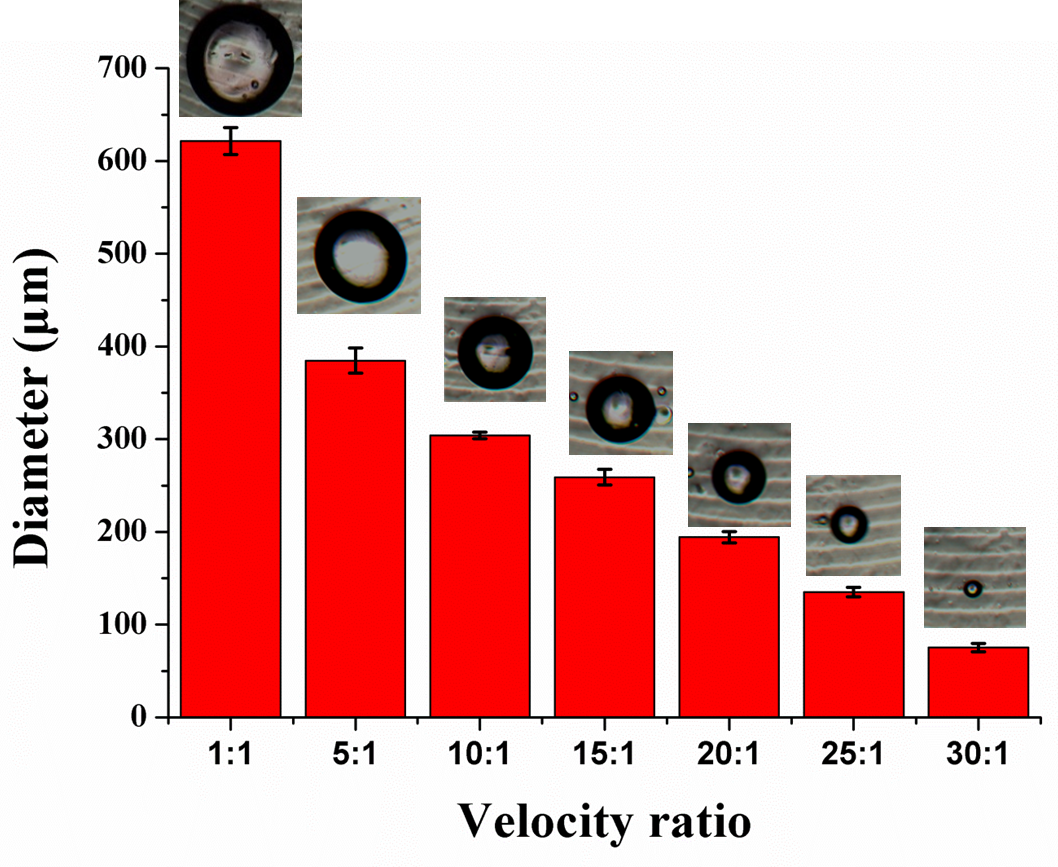


**Fig.S3** The influence of different oil-water ratios on the diameter of prepared TMPs gel microspheres.

**
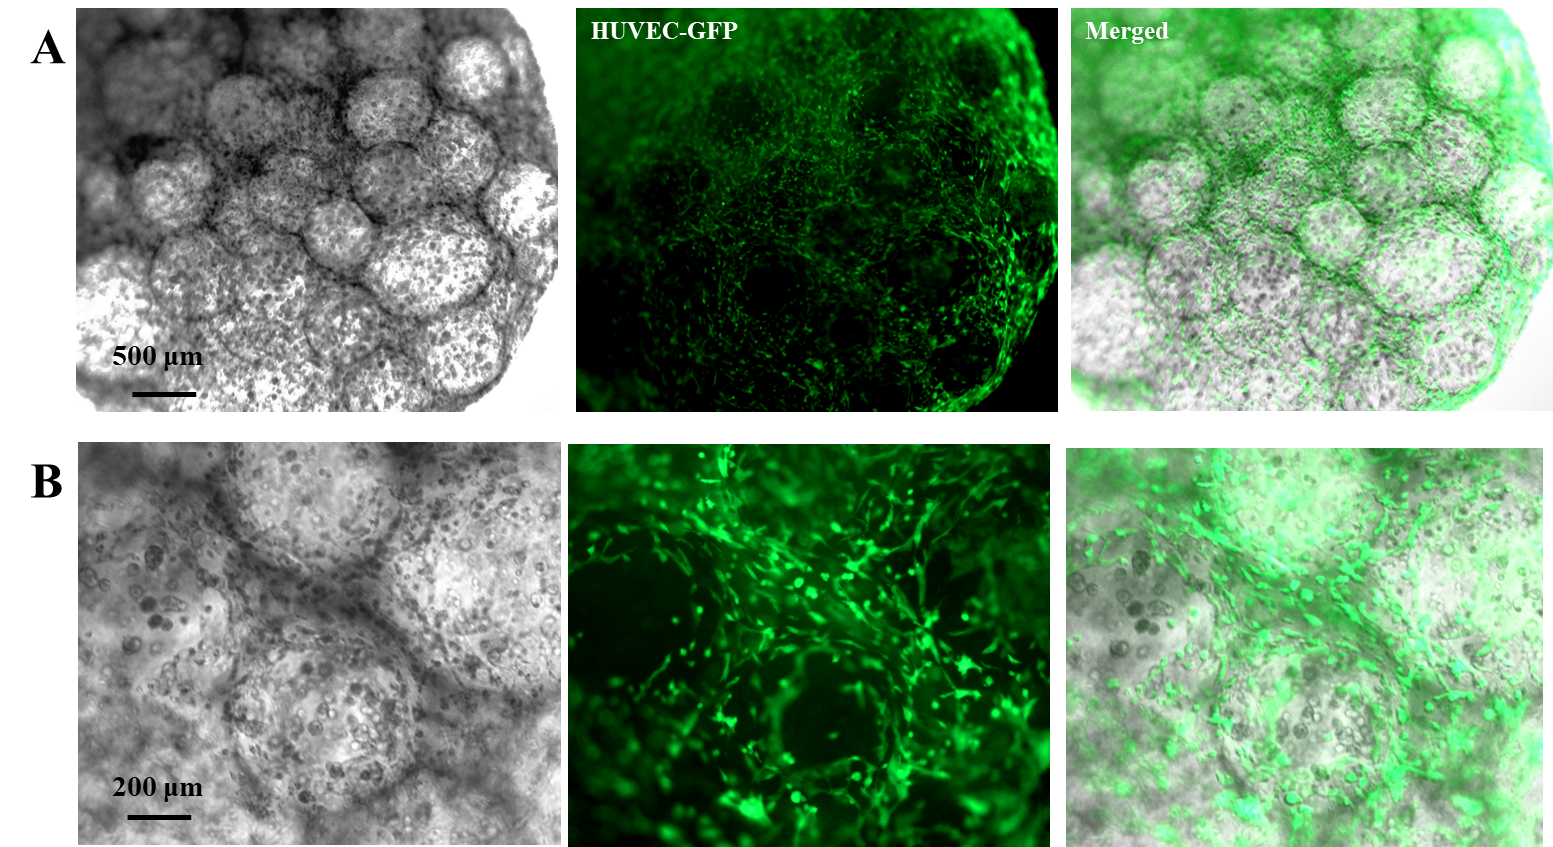
**

**Fig.S4** Experimental results of co-culture of TMPS and UVEC-GFP cells in the MH-TMPs group after 7 days.
